# Supplementary material
Source: PubMed Central journal article supplement (PMC5119552)
Supplement: NIHMS816976-supplement-2.pdf [file NIHMS816976-supplement-2.pdf]

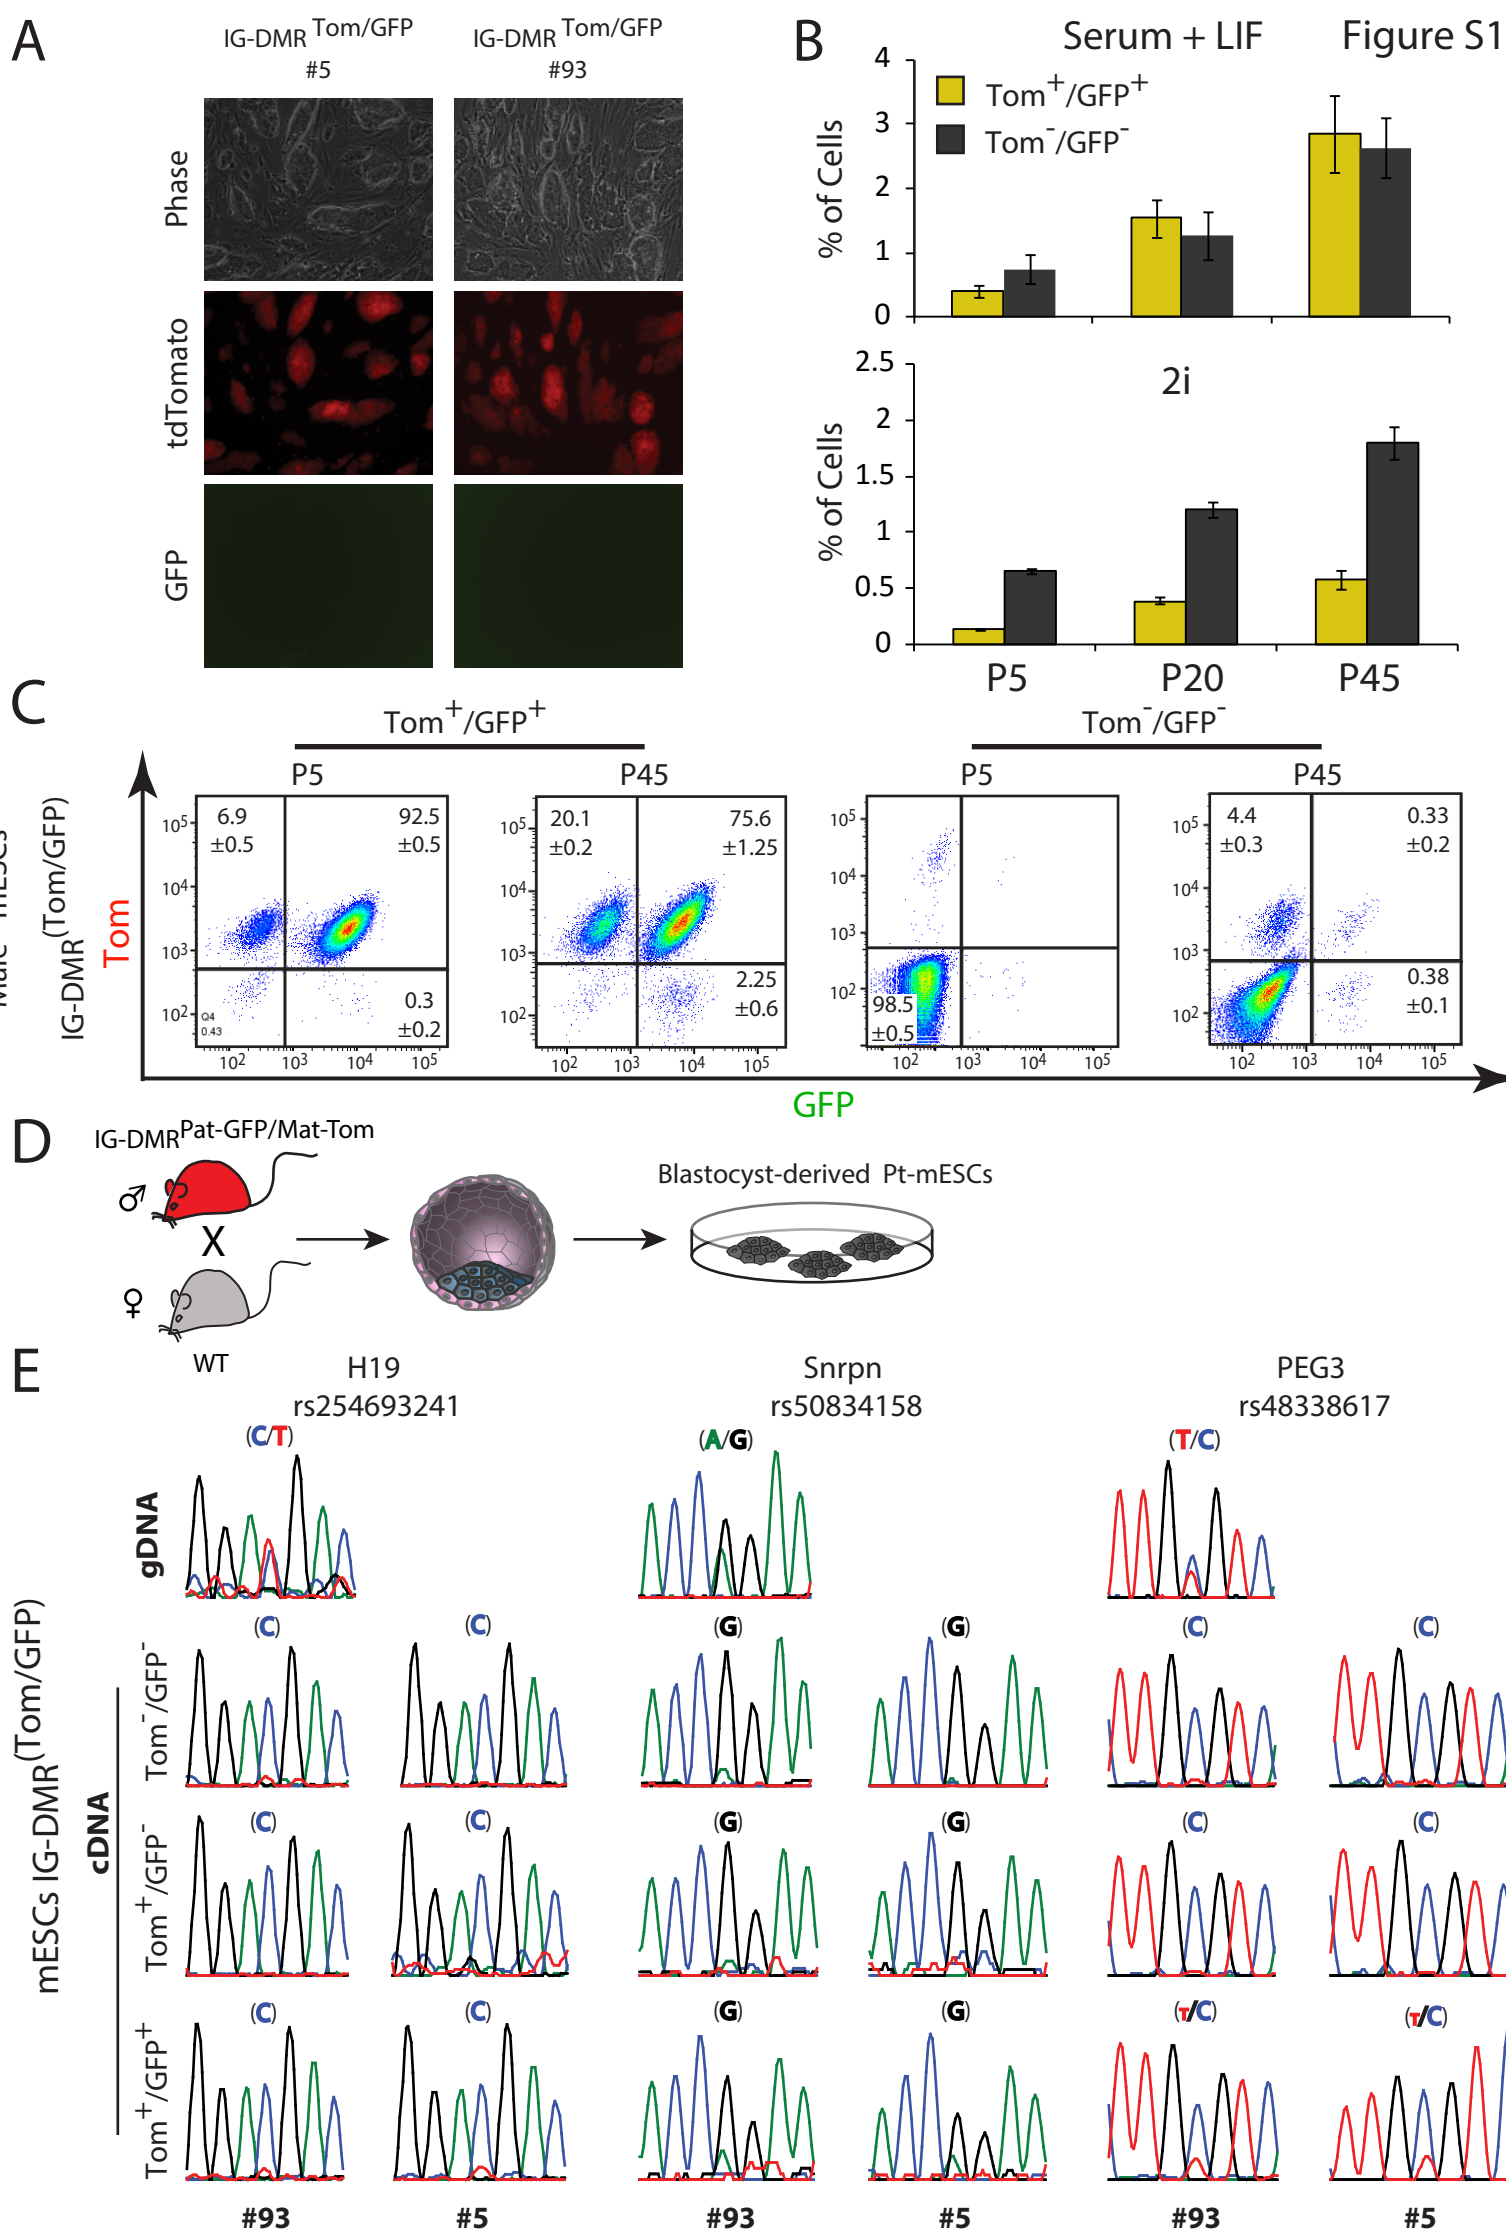

**Figure S1. Related to Figure 1. Analysis of mES IG-DMR<sup>(Tom/GFP)</sup> cells.**

(A) Representative images of two established mESC IG-DMR<sup>(Tom/GFP)</sup> lines.

(B) Bar-graph summarizing changes in the percentage of Tom<sup>+</sup>/GFP<sup>+</sup> and Tom<sup>-</sup>/GFP<sup>-</sup> cells at different passages. Shown is the average of 3 independently targeted cell lines  $\pm$  s.d.

(C) Flow cytometric analysis of the proportion of GFP/Tom-positive cells in sorted mESC IG-DMR Tom<sup>+</sup>/GFP<sup>+</sup> and mESC IG-DMR Tom<sup>-</sup>/GFP<sup>-</sup> lines during prolonged culture with serum+LIF. Shown are mean  $\pm$  s.d of two independent targeted cell lines.

(D) Schematic diagram of the mating scheme used for establishment paternally-transmitted (Pt) mESCs from ICM-blastocysts.

(E) Sequencing of three representative imprinted genes in sorted IG-DMR<sup>(Tom/GFP)</sup> mESC lines. Heterozygous SNPs were identified in the coding regions and analyzed in the cDNAs of two independently targeted cell lines. Note the minor T allele identified in Peg3 for mESC IG-DMR Tom<sup>+</sup>/GFP<sup>+</sup>, suggesting mosaicism in the sorted cell populations.

Figure S2

Tom<sup>+</sup>/GFP<sup>+</sup> Chimeras E14.5

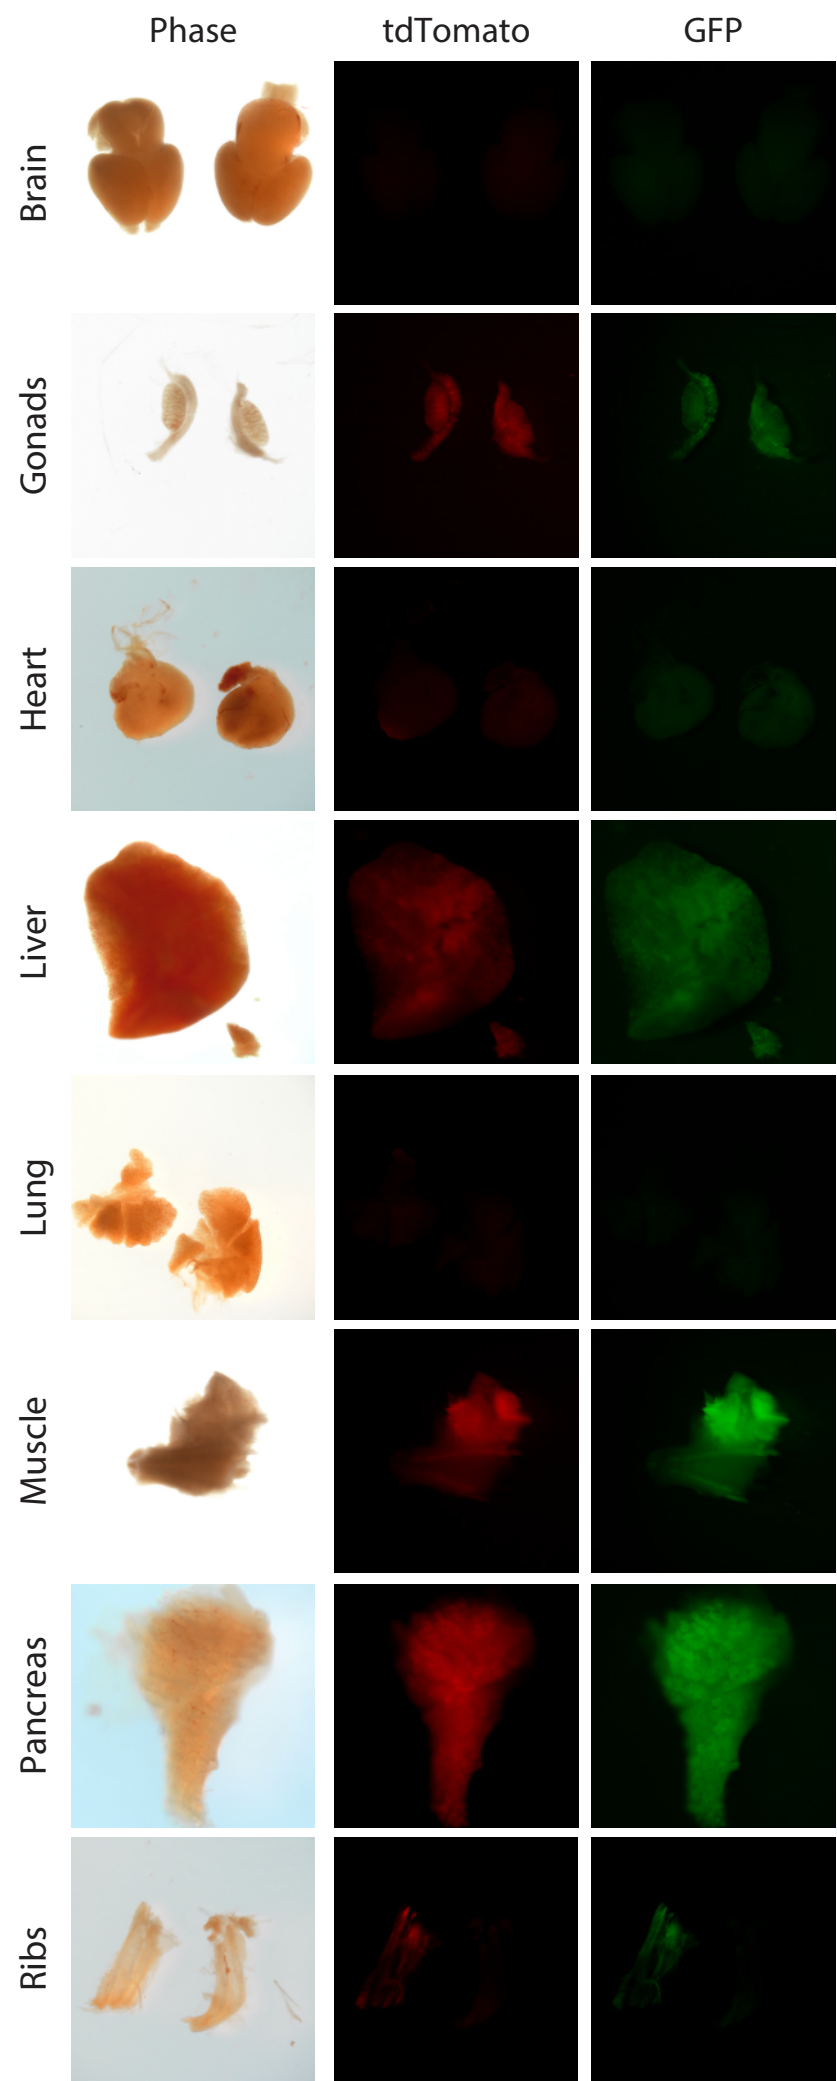

**Figure S2. Related to Figure 2. Organ analysis in E14.5 IG-DMR Tom<sup>+</sup>/GFP<sup>+</sup> chimeric embryos.**

Organs images obtained from E14.5 IG-DMR Tom<sup>+</sup>/GFP<sup>+</sup> chimeric embryos, demonstrating co-expression of Tom and GFP reporters in some tissues, and complete repression of reporter activity in other tissues. Representative images were consistent in 13 analyzed embryos between E12.5-14.5.

Figure S3

A

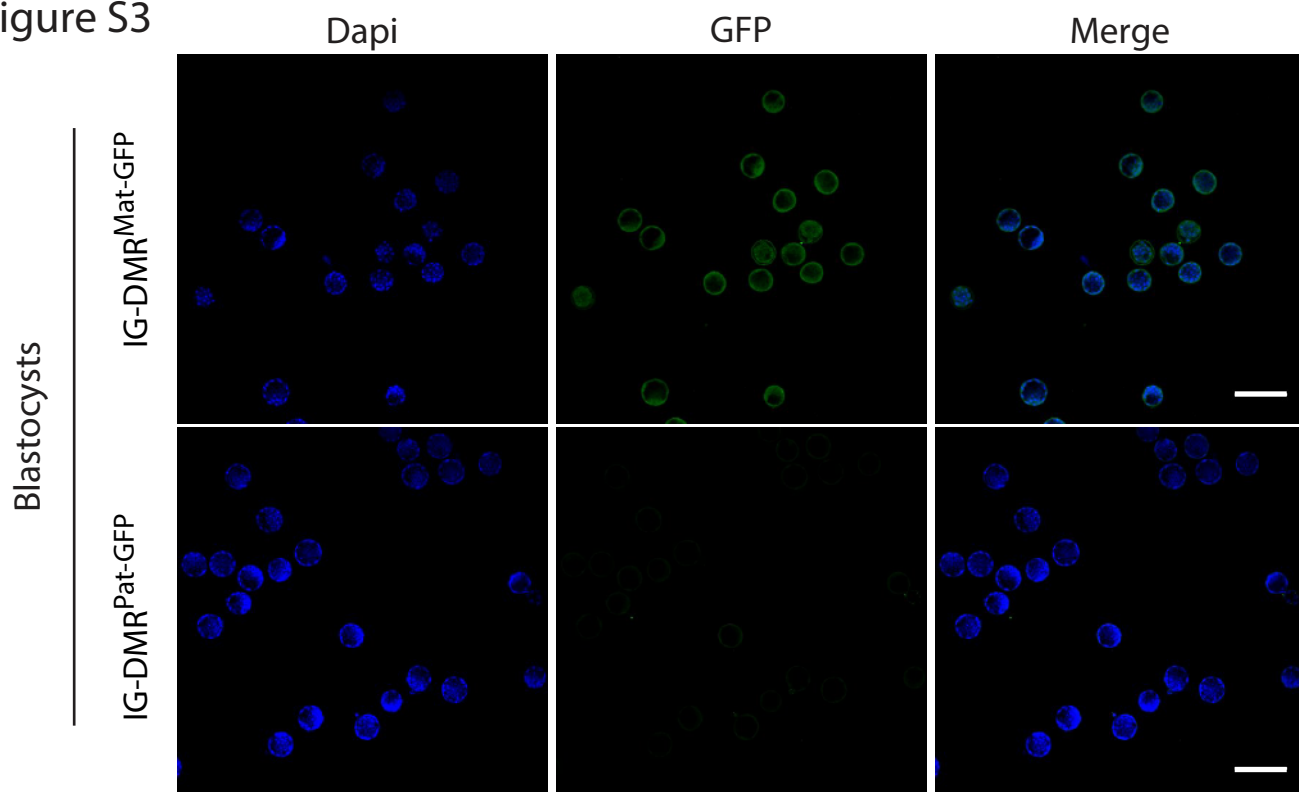

B

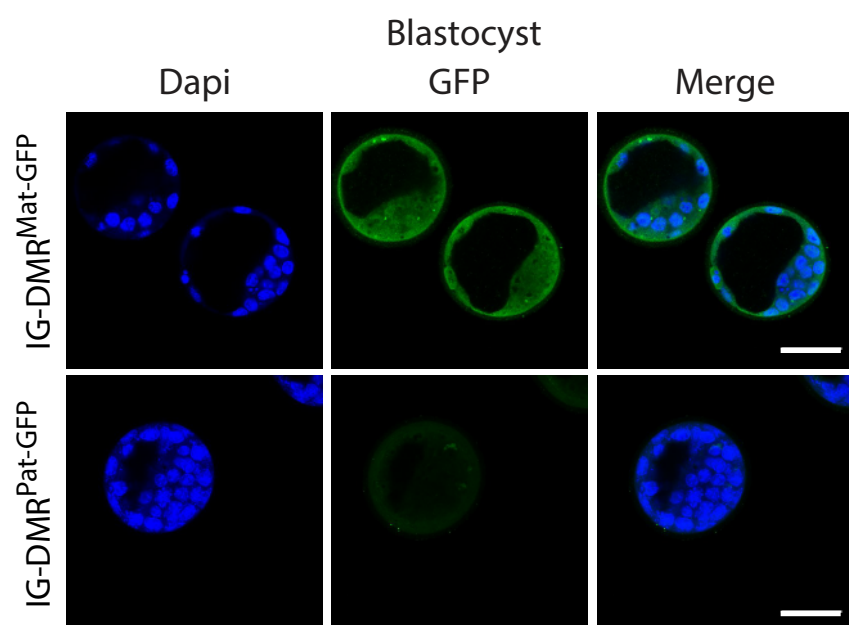

C

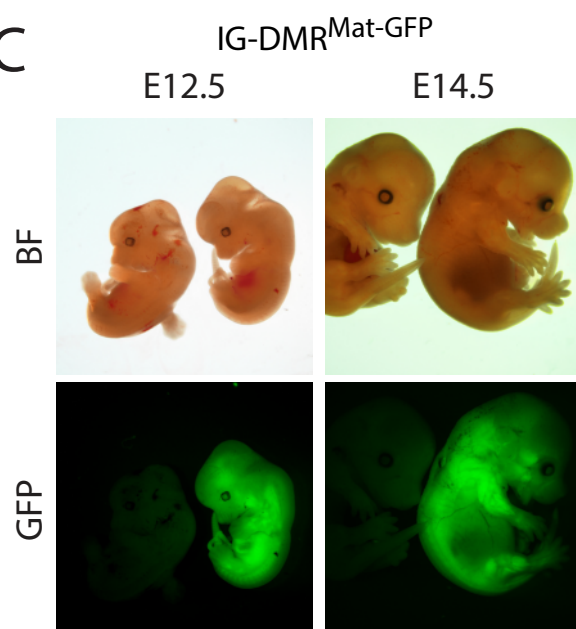

D

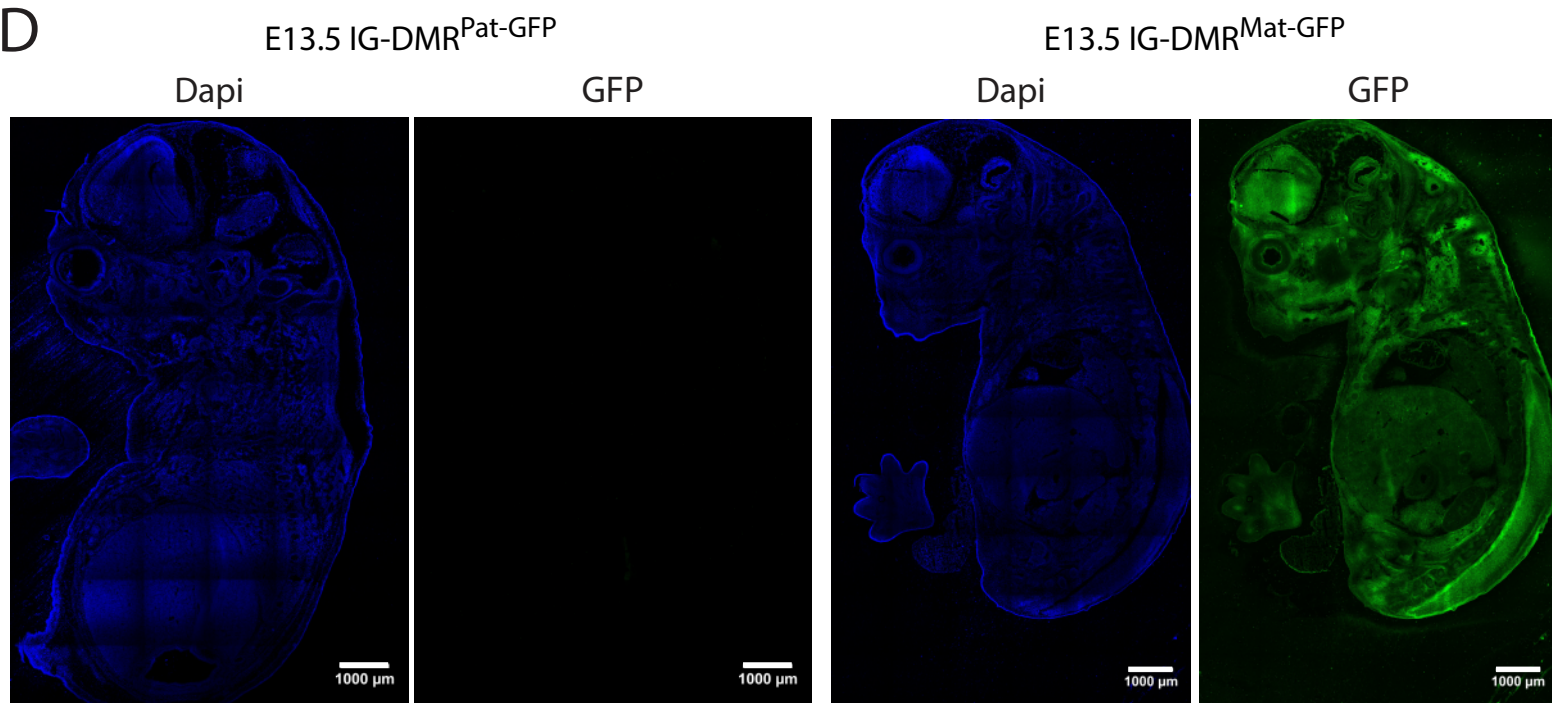

**Figure S3. Related to Figure 3. Analysis of IG-DMR<sup>Mat-GFP</sup> and IG-DMR<sup>Pat-GFP</sup> reporter mice during embryonic development.**

(A and B), Maternally and paternally transmitted IG-DMR<sup>GFP</sup> blastocysts were stained with Dapi and anti-GFP; (A) bar = 250µm; (B) bar = 50µm.

(C) Representative images of F2 IG-DMR<sup>Mat-GFP</sup> embryos at different developmental stages; Left are control embryos.

(D) Sagittal stitched sections of maternally and paternally transmitted IG-DMR<sup>GFP</sup> E13.5 embryos stained with Dapi and anti-GFP; bar = 1000 µm.

Figure S4

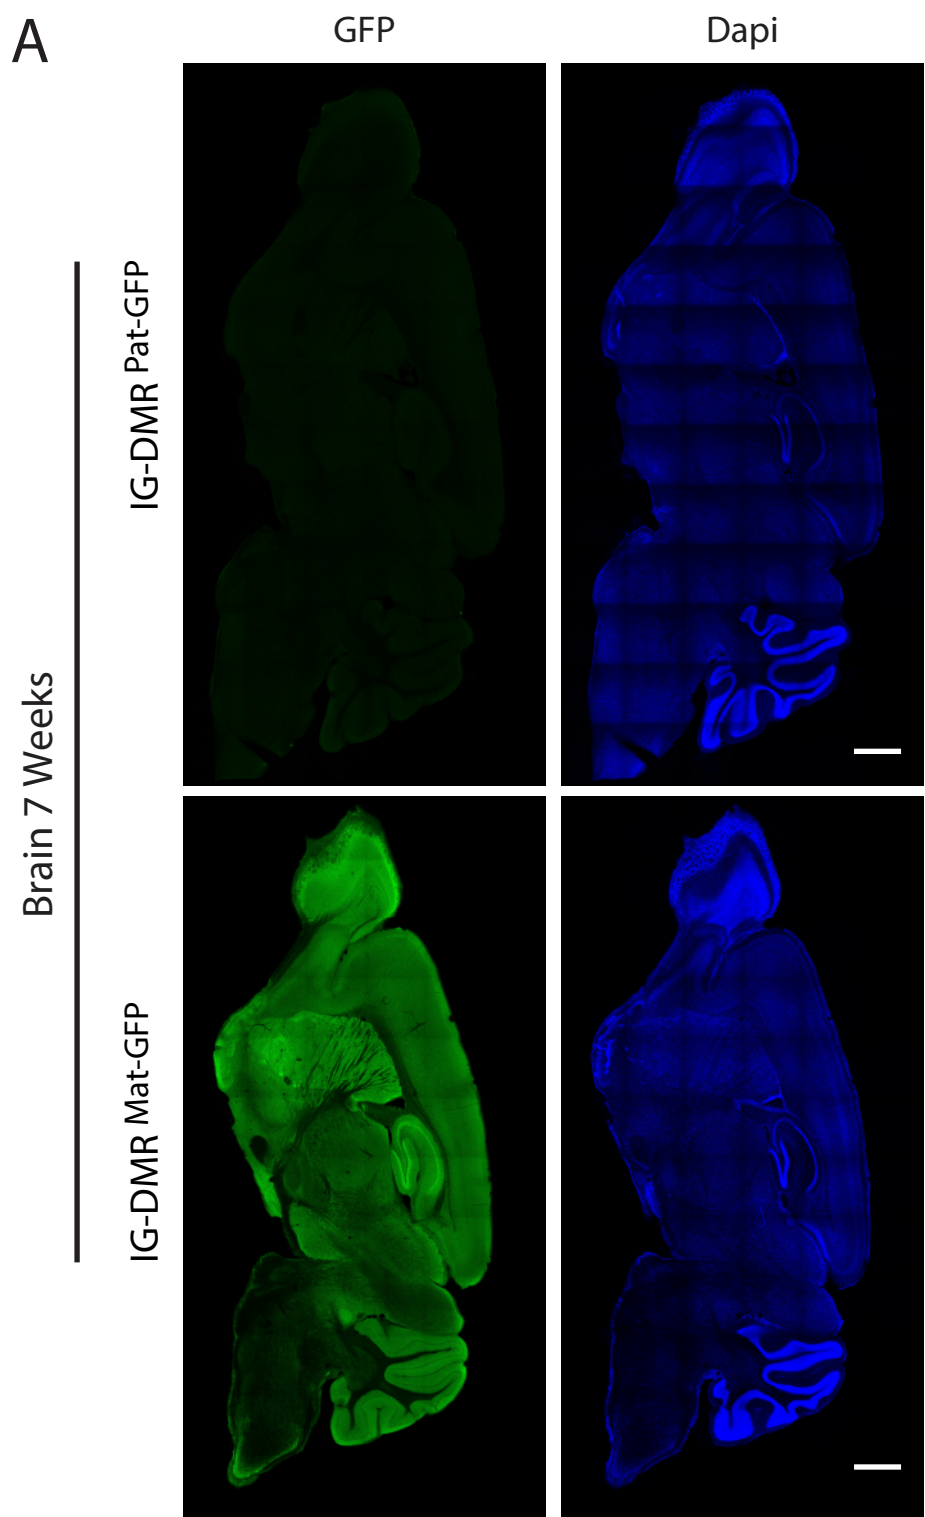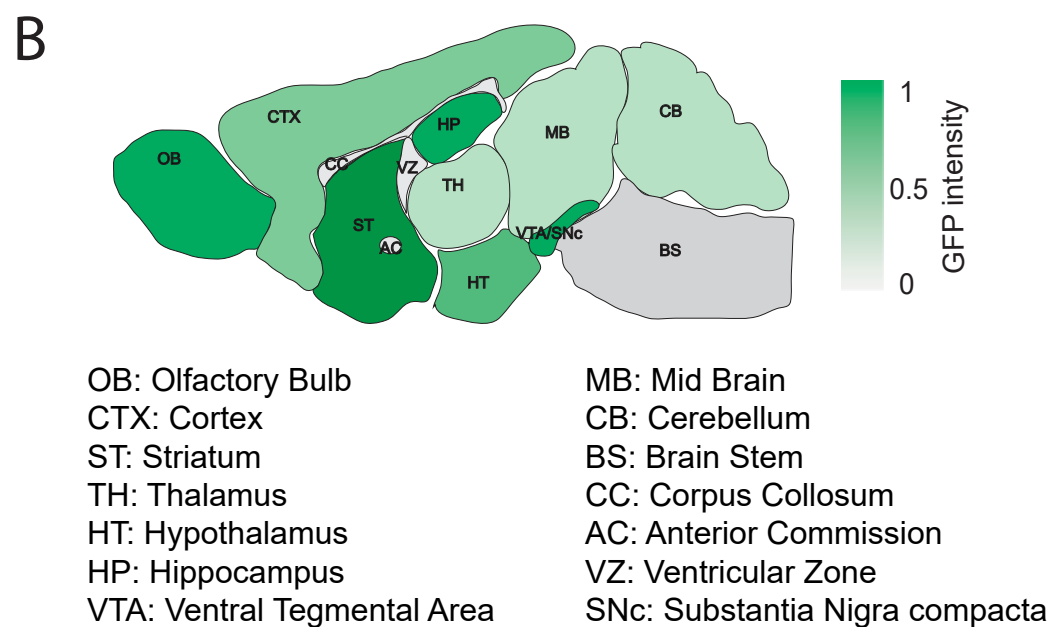

**Figure S4. Related to Figure 5. Analysis of adult brains in maternally and paternally transmitted IG-DMR<sup>GFP</sup> mice.**

(A) Representative image of IG-DMR<sup>Mat-GFP</sup> and IG-DMR<sup>Pat-GFP</sup> whole-mount stitched sagittal brain sections stained with Dapi and anti-GFP; bar = 1000  $\mu$ m.

(B) Heat map of GFP intensities in different brain anatomical regions, as measured in 6 independent 5-7 weeks old IG-DMR<sup>Mat-GFP</sup> mice.

Figure S5

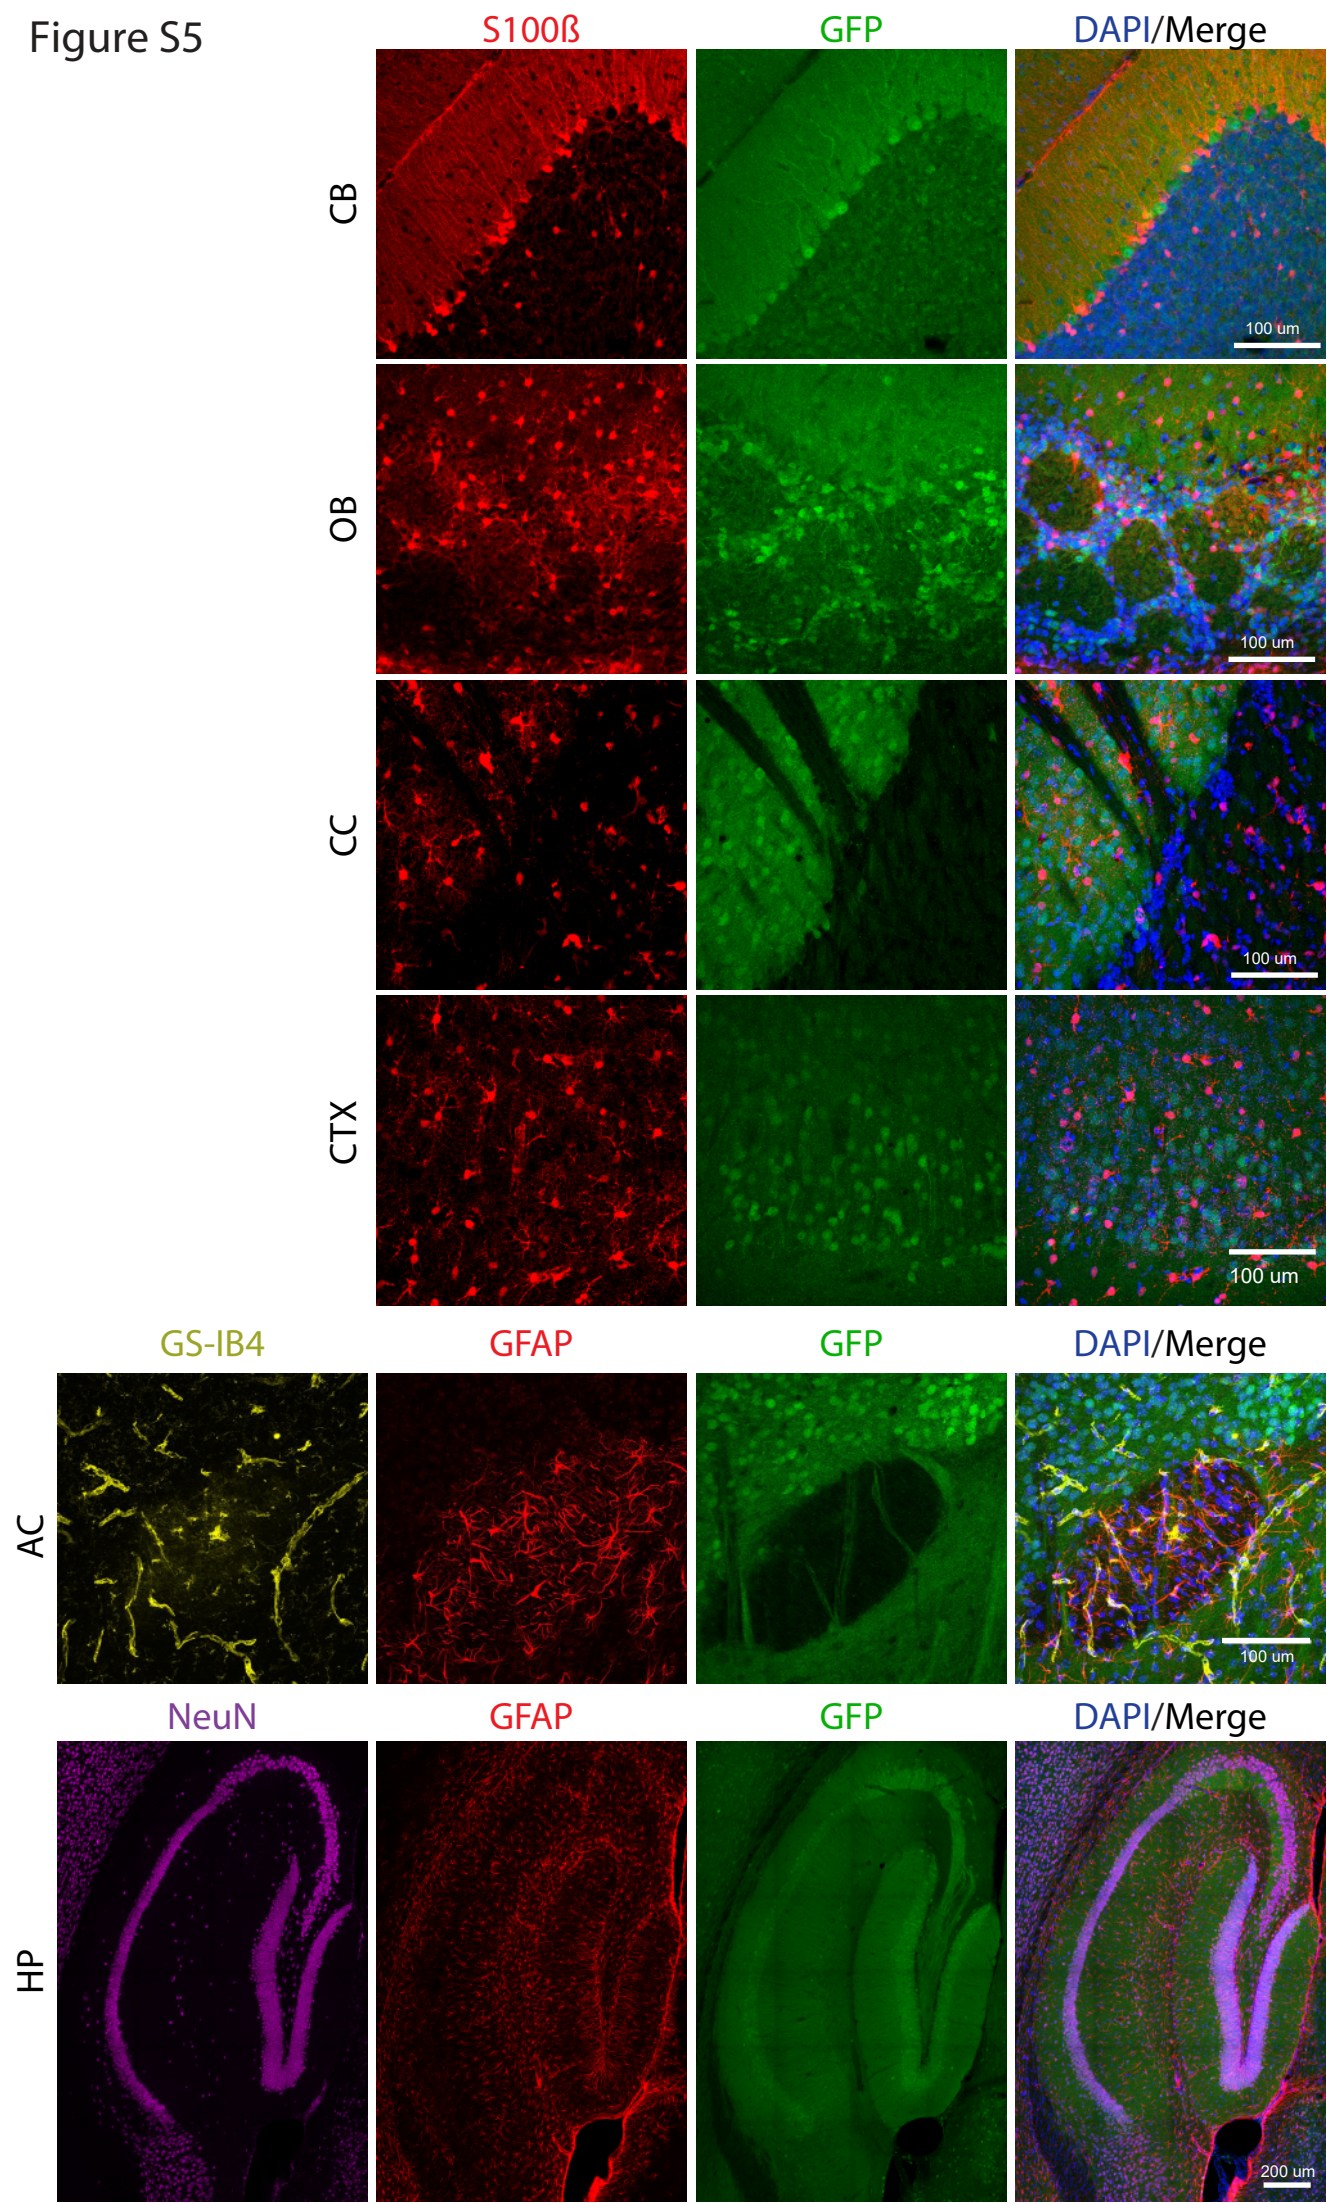

**Figure S5. Related to Figure 5. Analysis of astrocytic markers in IG-DMR<sup>Mat-GFP</sup> adult brains.**

Images of 5-7 weeks old brain sections stained with Dapi (blue), anti-GFP (green), anti-S100 $\beta$  (red), anti-Glial Fibrillary Acidic Protein (GFAP, red), anti-GS-IB4 (yellow) and anti-NeuN (purple); Shown are representative images obtained from different anatomical brain regions that include: Cerebellum (CB), Olfactory Bulb (OB); Corpus Collosum (CC), Cortex (CTX), Anterior Commission (AC) and stitched images of Hippocampus (HP). Note that GFP expression is mutually exclusive with the expression of bona-fide astrocytic markers S100 $\beta$  and GFAP, as well as with blood vessel endothelial cells (yellow) in all regions analyzed.

Figure S6

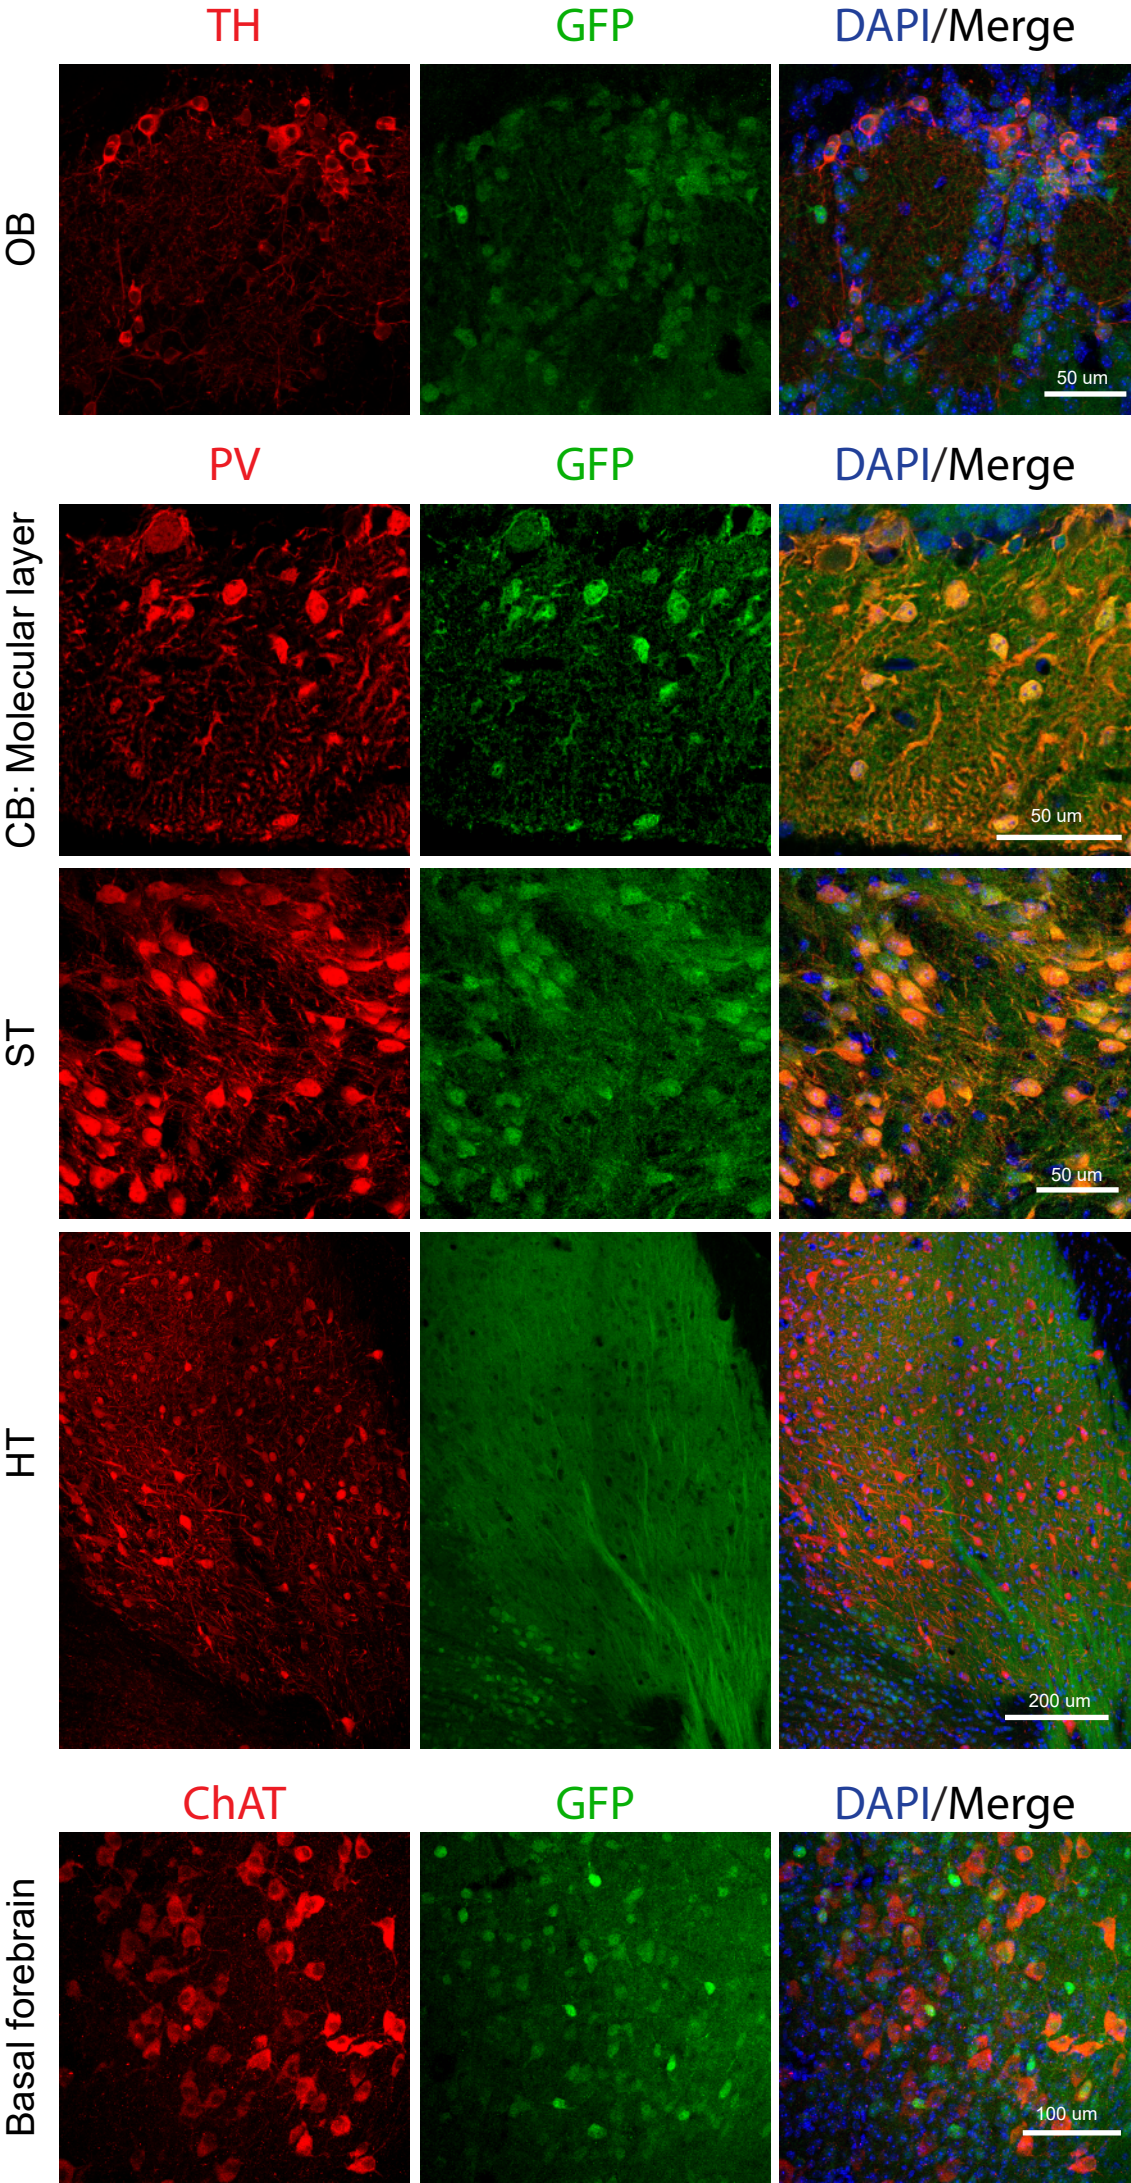

**Figure S6. Related to Figure 5. Analysis of different neuronal markers in IG-DMR<sup>Mat-GFP</sup> adult brains.**

Brain sections from 5-7 week old mice stained with DAPI (blue), anti-GFP (green), anti-Tyrosine Hydroxylase (TH, red), anti-Parvalbumin (PV, red) and anti-Choline Acetyltransferase (ChAT, red); Shown are representative images obtained from different anatomical brain regions that include: Olfactory Bulb (OB); Cerebellum (CB) molecular layer, Striatum (ST), stitched images of Hypothalamus (HT) and the Basal forebrain. Note that while complete overlap between GFP expression and TH; and between GFP and PV in the CB and ST regions was apparent, neurons stained with ChAT and PV (on the HT region) exhibited only partial overlap with GFP expression.

Figure S7

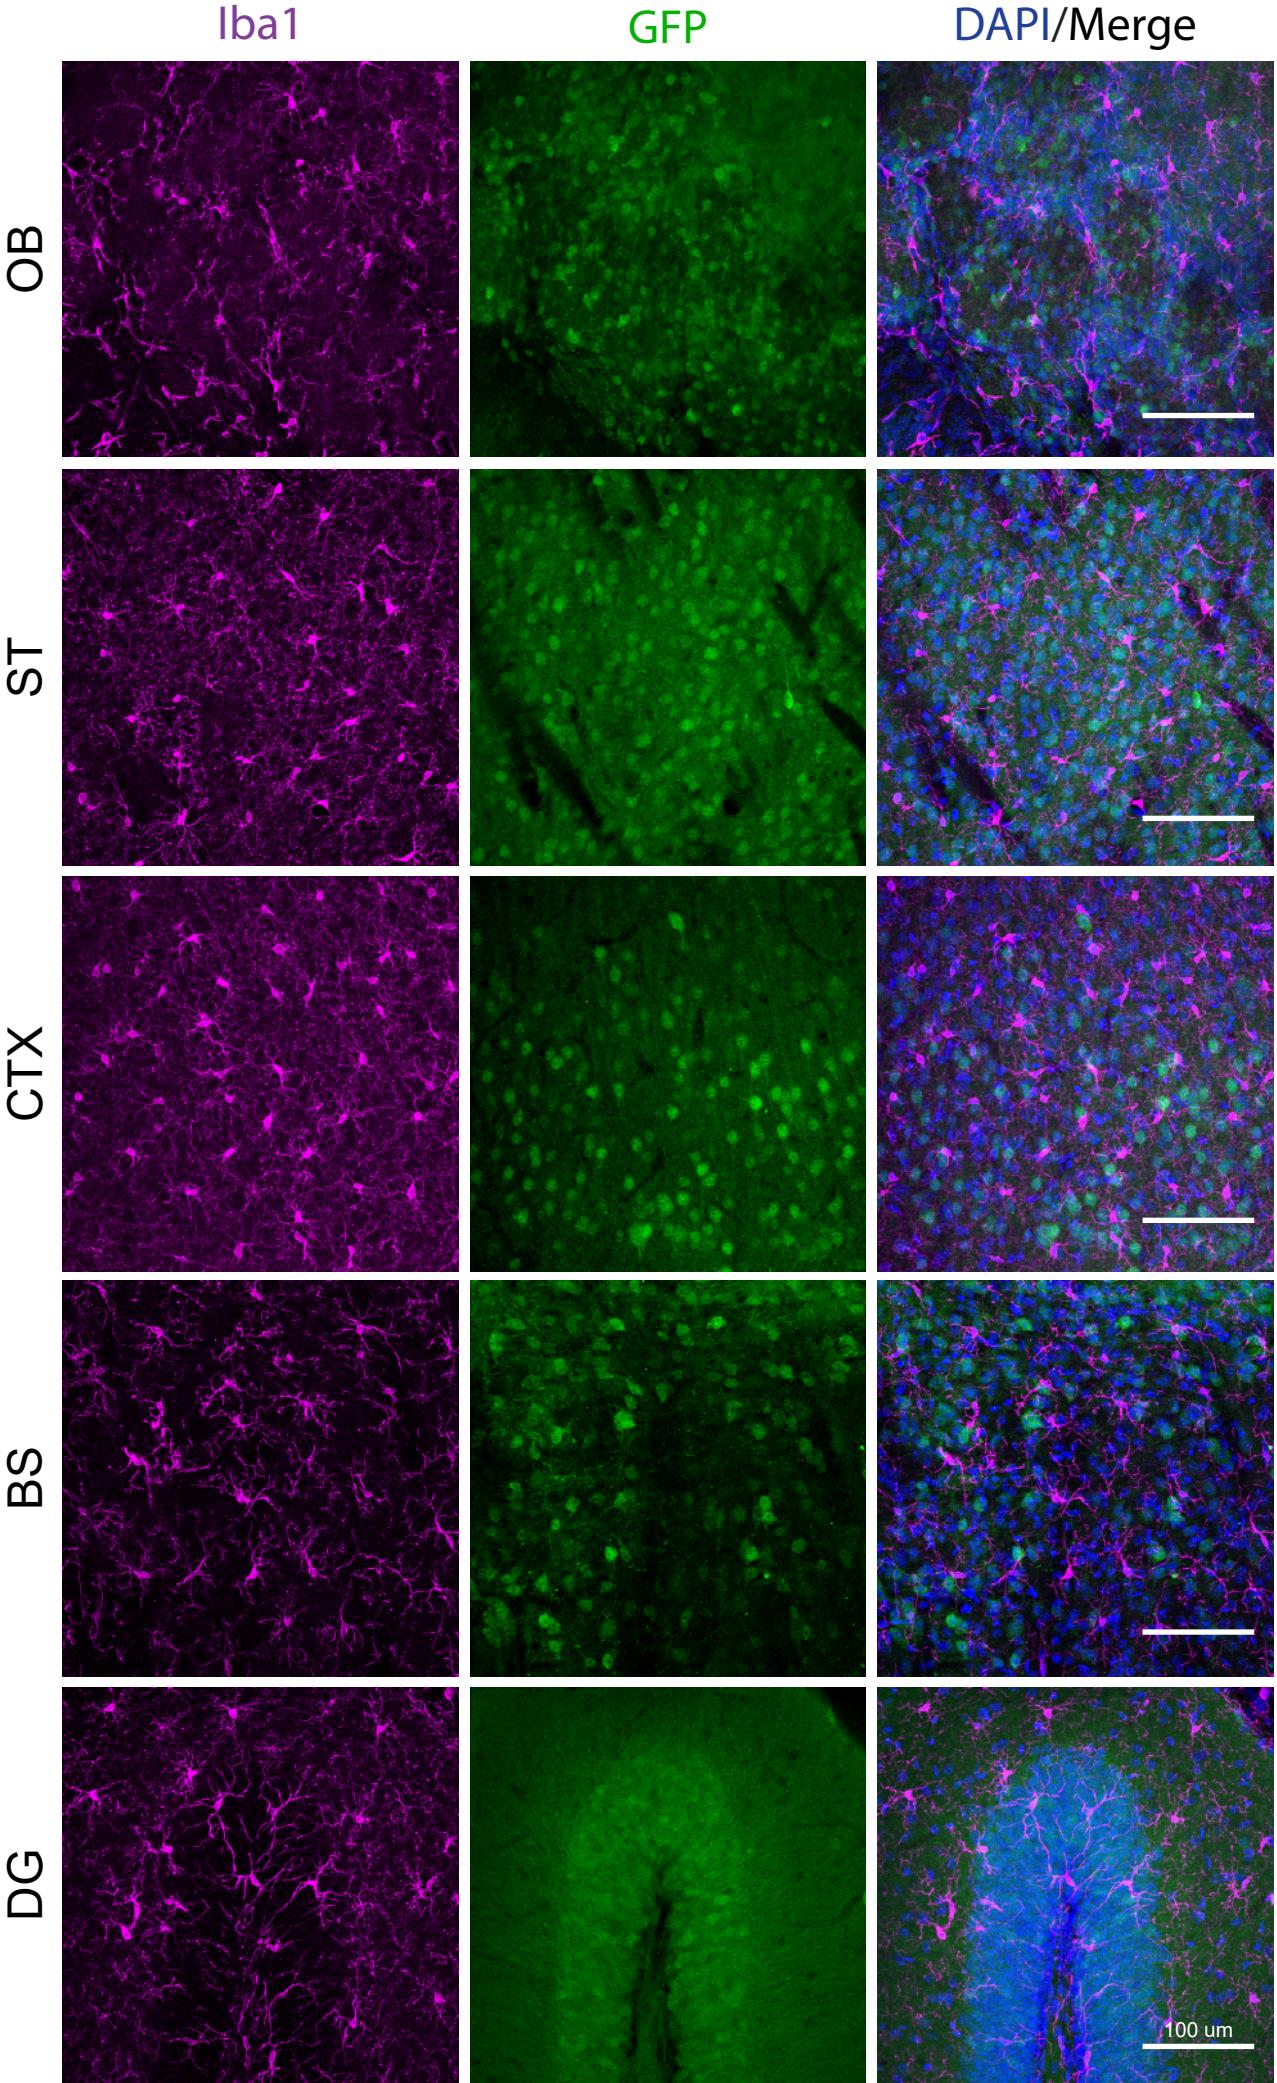

**Figure S7. Related to Figure 5. Analysis of microglia IG-DMR<sup>Mat-GFP</sup> adult brains.**

Brain sections from 5-7 weeks old mice stained with Dapi (blue), anti-GFP (green) and the microglia marker anti- Ionized calcium binding adapter molecule-1 (Iba1, purple); Shown are representative images obtained from different anatomical brain regions that include: Olfactory Bulb (OB), Striatum (ST), Cortex (CTX), Brain Stem region (BS) and the Dentate Gyrus (DG). Note that GFP expression is mutually exclusive with the expression of Iba1, in all regions analyzed.

Figure S8

GFP

Calbindin

DAPI

A

Cerebellum

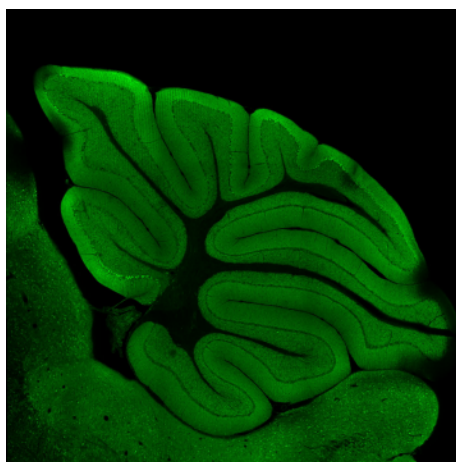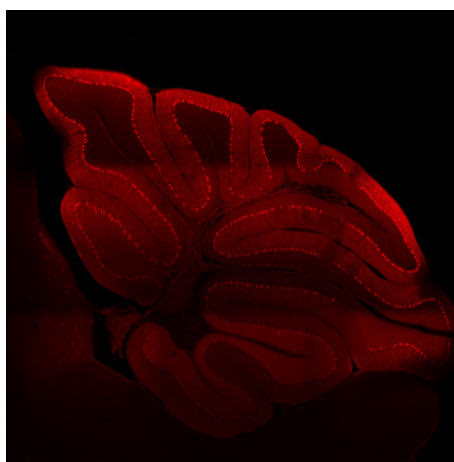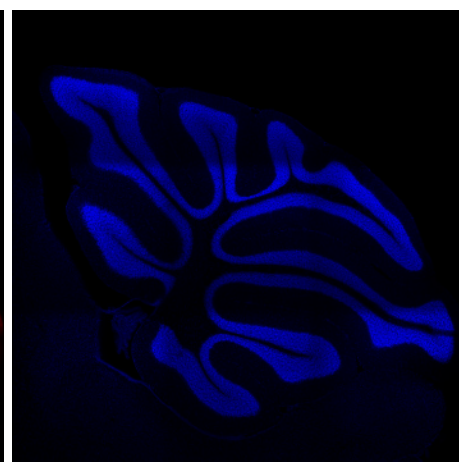

Merge

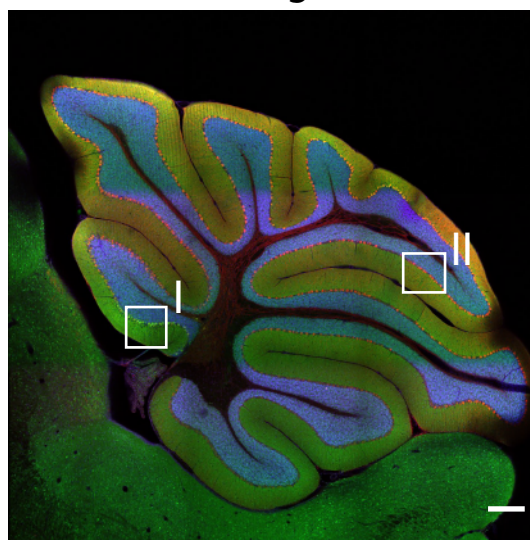

B

GFP

Calbindin

DAPI/Merge

I. Cerebellum

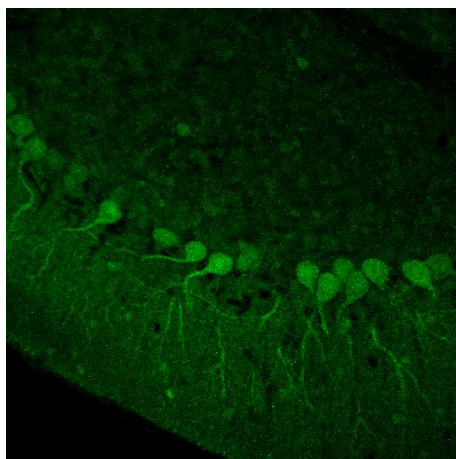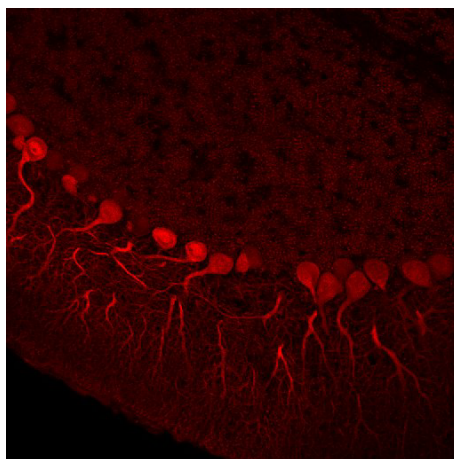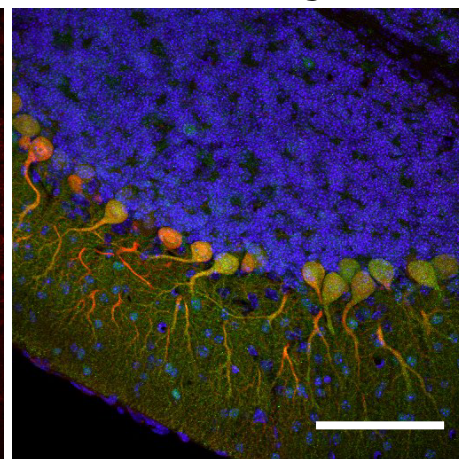

II. Cerebellum

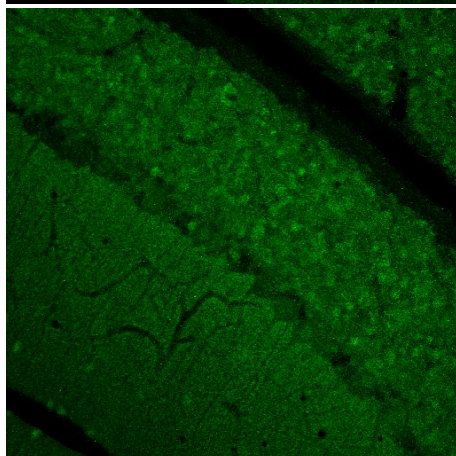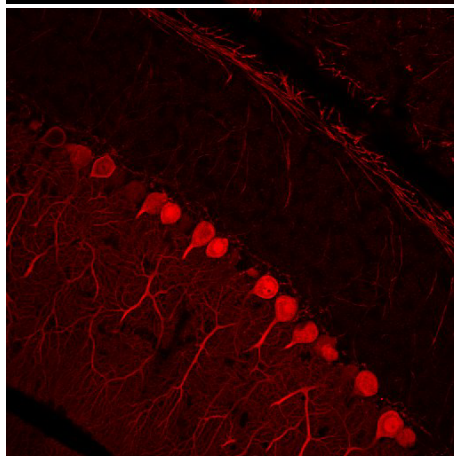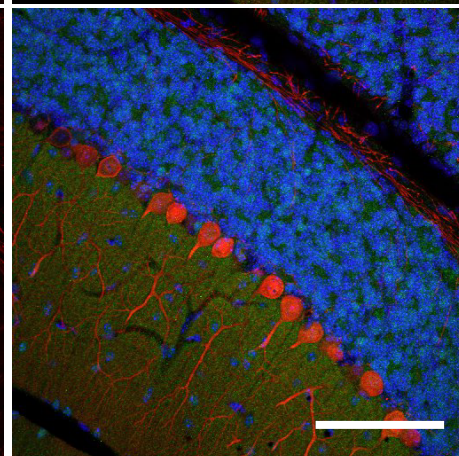

**Figure S8. Related to Figure 5. GFP heterogeneity in Cerebellum Purkinje cell in IG-DMR<sup>Mat-GFP</sup> adult brains.**

Images of 5-7 weeks old brain sections stained with Dapi (blue), anti-GFP (green) and Purkinje cell marker Calbindin (red). (A) Shown is whole mount stitching Cerebellum images (bar = 500  $\mu$ m) with blowup of (B) two representative lobe regions, demonstrating that while most cells are Calbindin<sup>+</sup>GFP<sup>-</sup> (as indicated in region II), some lobes contain Calbindin<sup>+</sup>GFP<sup>+</sup> cells (as indicated in region I); bar = 100 $\mu$ m.

Figure S9

A

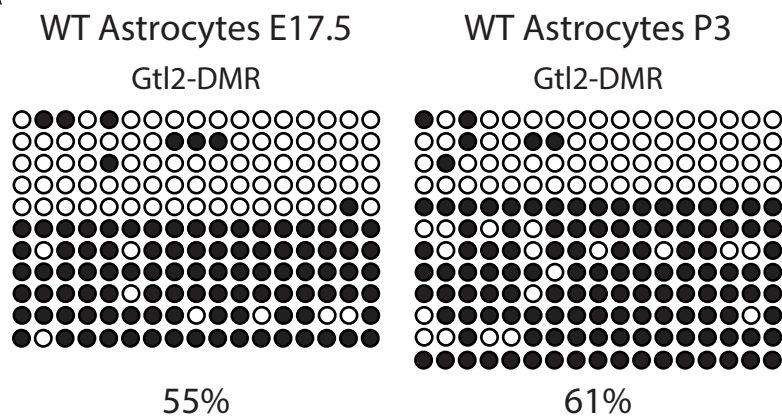

B

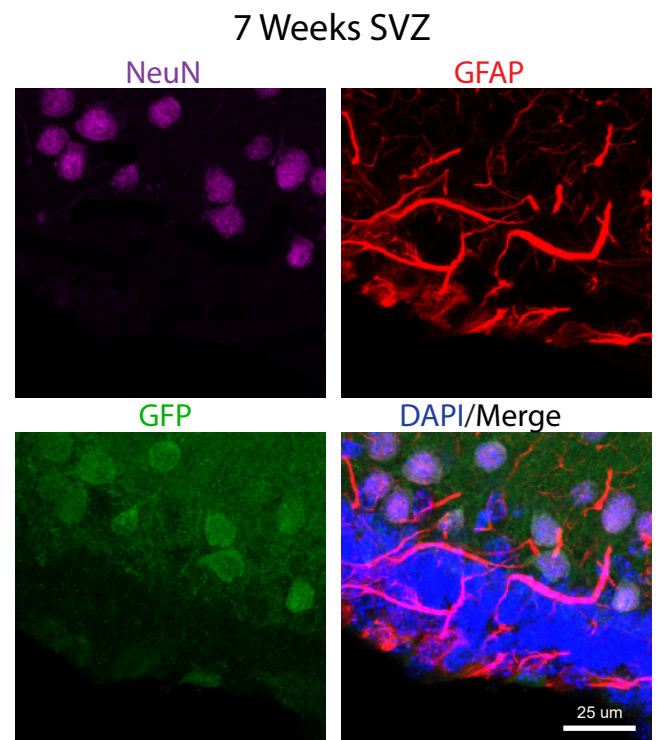

C

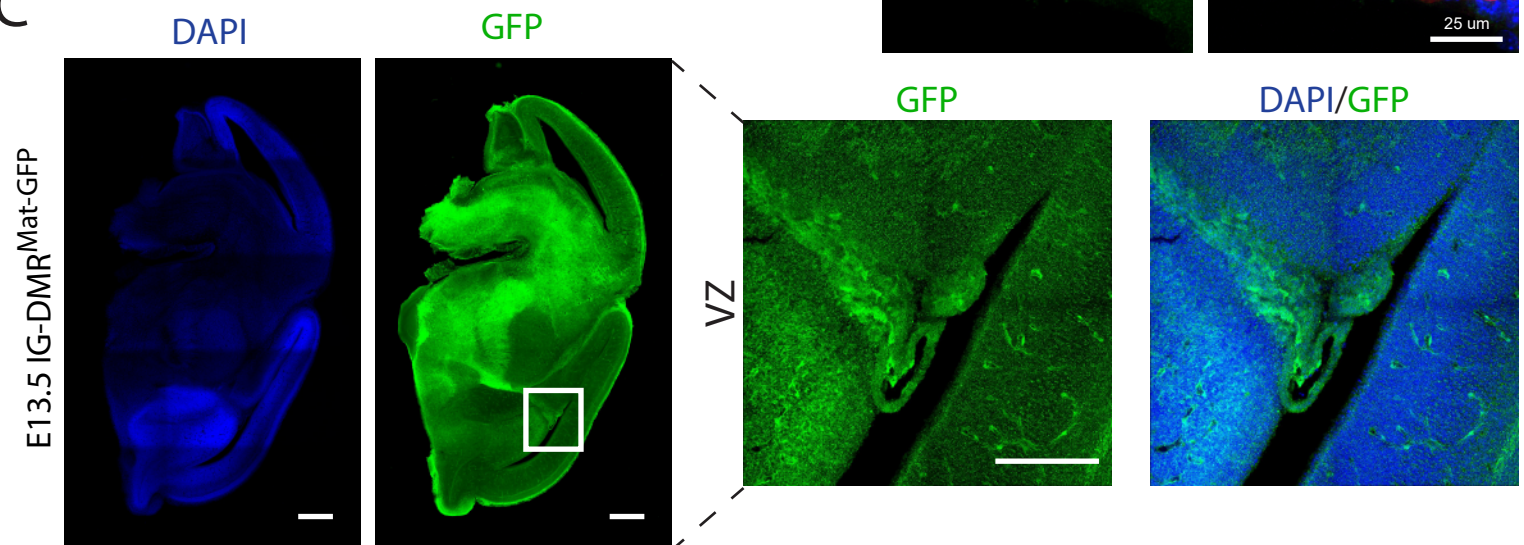

D

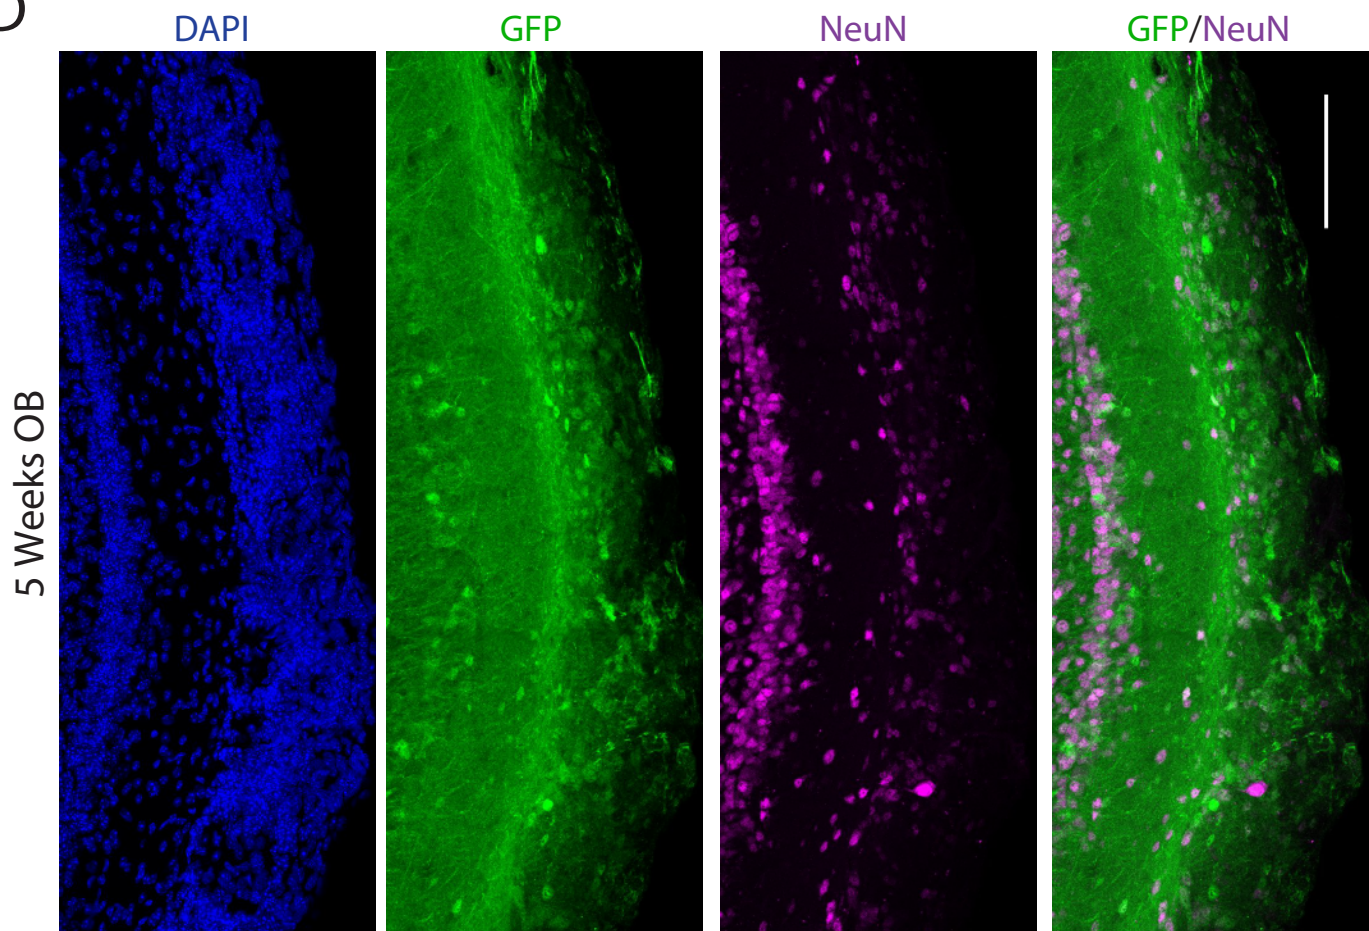

**Figure S9. Related to Figure 6. Analysis of IG-DMR<sup>Mat-GFP</sup> brains.**

(A) Bisulfite sequencing was performed on the Gtl2 promoter DMR region in WT astrocytes isolated from E17.5 and P3 brains. Shown are percentages of methylated CpGs. Note the presence of completely methylated and unmethylated alleles suggesting proper parent-specific monoallelic methylation.

(B) Representative images of the Subventricular Zone (SVZ) ependyma wall stained with Dapi (blue), anti-GFP (green), anti-Glial Fibrillary Acidic Protein (GFAP, red) and anti-NeuN (purple); bar=25µm.

(C) Representative whole mount stitched sagittal section of E13.5 IG-DMR<sup>Mat-GFP</sup> brain stained with Dapi (blue) and anti-GFP (green); bar = 500 µm. Right panel include Dapi and GFP blowup images of the E13.5 Ventricular Zone (VZ), demonstrating overall GFP positivity in this region; bar = 100 µm.

(D) Representative stitching images of the Olfactory Bulb (OB) in 5 weeks IG-DMR<sup>Mat-GFP</sup> brain. Sections were stained with Dapi (blue), anti-GFP (green) and anti-NeuN (purple), demonstrating mosaicism in GFP expression in Neun positive cells. bar = 100µm.
